# Supplementary material for: Pervasive co-regulation of alternative splicing with transcription initiation and termination.
Source: Research Square preprint supplement (doi:10.21203/rs.3.rs-7727550/v1), 2025-10-15
Supplement: Supplementary file 1 [file b3e82cc29621bd1b0600ee47.docx]

The sequencing data are available at:

https://www.biosino.org/node/review/detail/OEV00000653?code=22MYBSHQ

The code of the longPASS algorithm, including example data and analysis results, are available at:

https://github.com/wwei-lab/longpass

The analysis codes for TASE identification are available at:

https://doi.org/10.5281/zenodo.11191805
